# Supplementary material
Source: publisher figshare collection journal article supplement (https://tandf.figshare.com/ndownloader/files/22231935)

**Supplementary Information**

**Table S1. List of biological control agents of *Ageratina adenophora***

| **S.N** | **Name of agents** | **Family** |
| --- | --- | --- |
| **1** | *Baeodromus eupatorii* (Fungi) | Pucciniosiraceae |
| **2** | *Dihammus argentatus* (Coleoptera) | Cerambycidae |
| **3** | *Doryluss orientalis* (Hymenoptera) | Formicidae |
| **4** | *Oidaematophorus beneficus* (Lepidoptera) | Pterophoridae |
| **5** | *Passalora ageratinae* (Fungi) | Mycosphaerellaceae |
| **6** | *Procecidochares utilis* (Diptera) | Tephritidae |
| **7** | *Xanthaciura connexionis* (Diptera) | Tephritidae |

Reference: Poudel et al., 2019. Biology and management of an invasive weed *Ageratina adenophora* (Asteraceae): current state of knowledge and future research needs.

**Table S2. Selected sites and geographic location of the sites in central Nepal**

| **Sites** | **Elevation belt (m)** | **Location coordinates** |
| --- | --- | --- |
| **Simbhanjyang** | 500 | N 27.77234° E 85.02966° |
|  | 500 | N 27.77231° E 85.02956° |
|  | 500 | N 27.77233° E 85.02961° |
|  | 1000 | N 27.72224° E 85.12679° |
|  | 1000 | N 27.72245° E 85.12852° |
|  | 1000 | N 27.71892° E 85.13263° |
|  | 1500 | N 27.71568° E 85.08694° |
|  | 1500 | N 27.71646° E 85.08712° |
|  | 1500 | N 27.71660° E 85.08773° |
|  | 2000 | N 27.62041° E 85.08368° |
|  | 2000 | N 27.62020° E 85.08368° |
|  | 2000 | N 27.61987° E 85.08429° |
|  | 2400 | N 27.59932° E 85.08715° |
|  | 2400 | N 27.59965° E 85.08712° |
|  | 2400 | N 27.59977° E 85.08709° |
| **Chandragiri** | 1500 | N 27.68638° E 85.21568° |
|  | 1500 | N 27.68607° E 85.21549° |
|  | 1500 | N 27.68613° E 85.21559° |
|  | 1650 | N 27.68383° E 85.21361° |
|  | 1650 | N 27.68376° E 85.21372° |
|  | 1650 | N 27.68387° E 85.21373° |
|  | 1750 | N 27.68253° E 85.21271° |
|  | 1750 | N 27.68259° E 85.21301° |
|  | 1750 | N 27.68250° E 85.21298° |
|  | 1950 | N 27.67844° E 85.21093° |
|  | 1950 | N 27.67854° E 85.21090° |
|  | 1950 | N 27.67867° E 85.21094° |
|  | 2150 | N 27.67298° E 85.20851° |
|  | 2150 | N 27.67293° E 85.20846° |
|  | 2150 | N 27.67301° E 85.20854° |
|  | 2350 | N 27.66969° E 85.20679° |
|  | 2350 | N 27.66975° E 85.20681° |
|  | 2350 | N 27.66978° E 85.20683° |
|  | 2480 | N 27.66596° E 85.20642° |
|  | 2480 | N 27.66603° E 85.20635° |
|  | 2480 | N 27.66610° E 85.20628° |
|  | 2530 | N 27.66578° E 85.20580° |
|  | 2530 | N 27.66575° E 85.20547° |
|  | 2530 | N 27.66581° E 85.20555° |
| **Chitwan** | 240 | N 27.6857° E 84.56345° |
|  | 240 | N 27.68538° E 84.56361° |
|  | 240 | N 27.68487° E 84.56325° |
| **Rasuwa** | 2630 | N 28.10358° E 85.32462° |
|  | 2630 | N 28.10344° E 85.32471° |
|  | 2630 | N 28.10331° E 85.32486° |
|  | 2932 | N 28.10687° E 85.32870° |
|  | 2944 | N 28.10687° E 85.32471° |
|  | 2965 | N 28.10687° E 85.32870° |

**Figure S1.** Relationship between gall diameter and diameter of stem with gall in central Nepal. **A.** Simbhanjyang and **B.** Chandragiri


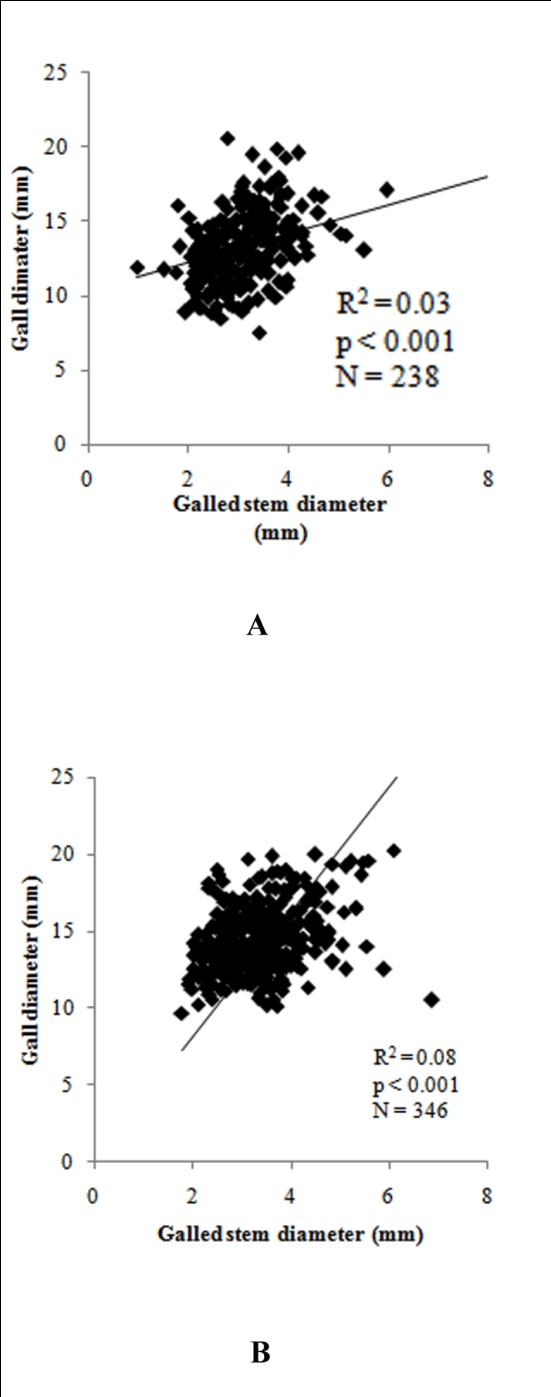

Supplement: Supplementary file 1 [file 22231935]
